# Supplementary material for: Tubeimoside-2 Triggers Methuosis in Hepatocarcinoma Cells through the MKK4–p38α Axis
Source: MDPI journal article supplement (doi:10.3390/pharmaceutics15041093), 2023-03-29
Supplement: s1 [file s1]

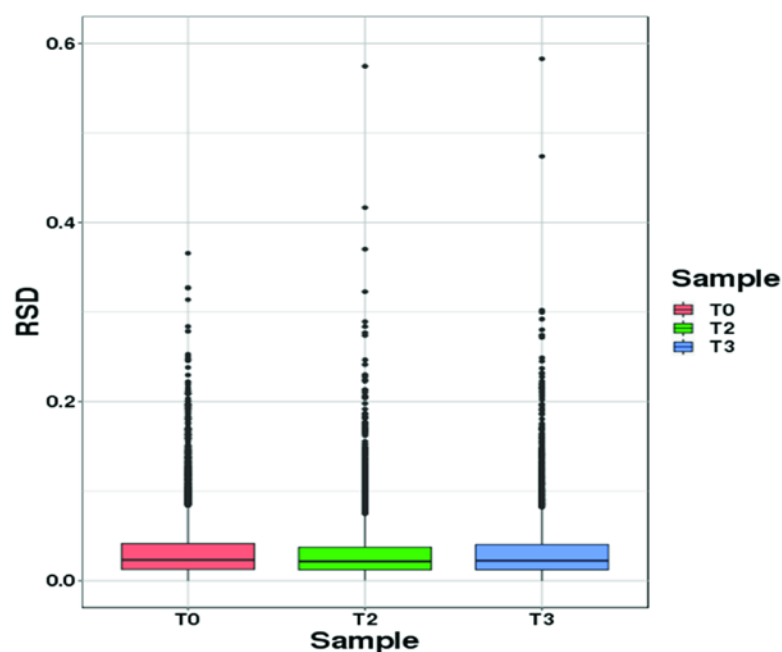

**Supplement Figure1. RSD of the Proteomic Analysis among Different Treatment Groups**  
Cells were treated with DMSO or TBM-2 for 24h. (T0: DMSO; T2: 2µM TBM-2; T4: 4µM TBM-2)

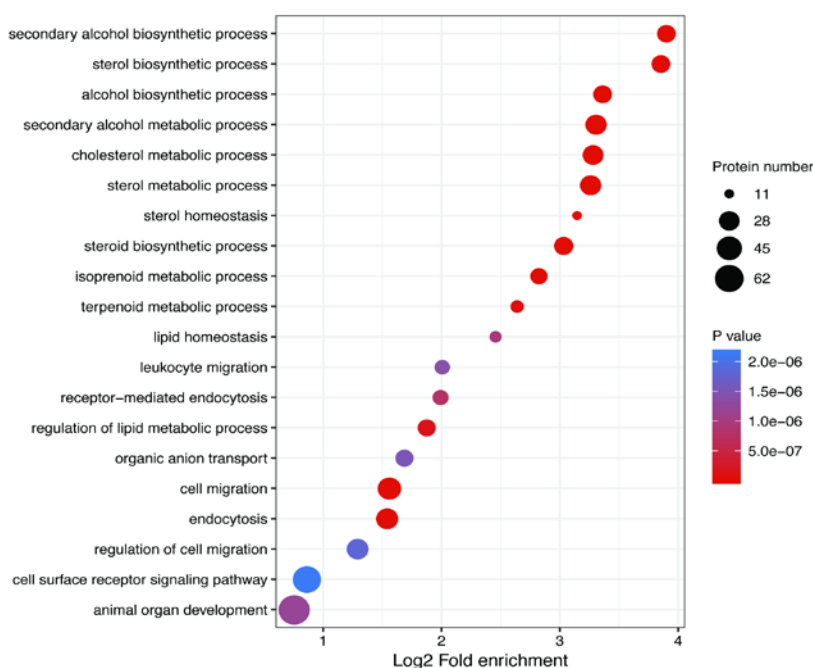

**Supplement Figure2. Gene Ontology(GO) Enrichment Analysis of Up- and Down- regulated Proteins Due to TBM-2 Treatment**

GO enrichment analysis of differentially regulated proteins between DMSO and TBM-2 treatment groups. Cells were equally cultured and proceeded to either DMSO or 2µM TBM-2 for 24h before harvesting.

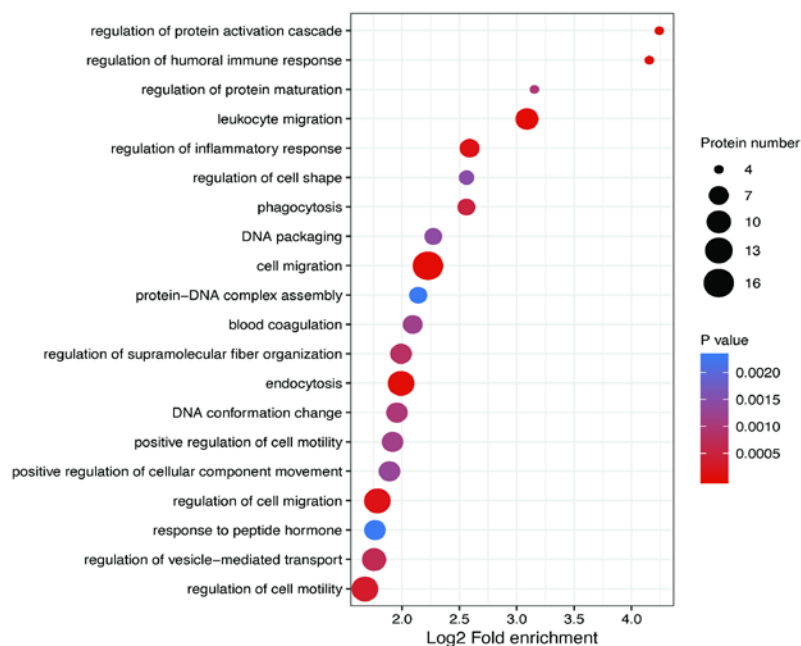

**Supplement Figure3. Gene Ontology(GO) Enrichment Analysis of Down- regulated Proteins in Whole Protein Level Due to TBM-2 Treatment**

GO enrichment analysis of down-regulated proteins between DMSO and TBM-2 treatment groups. Cells were equally cultured and proceeded to either DMSO or 2 $\mu$ M TBM-2 for 24h before harvesting.

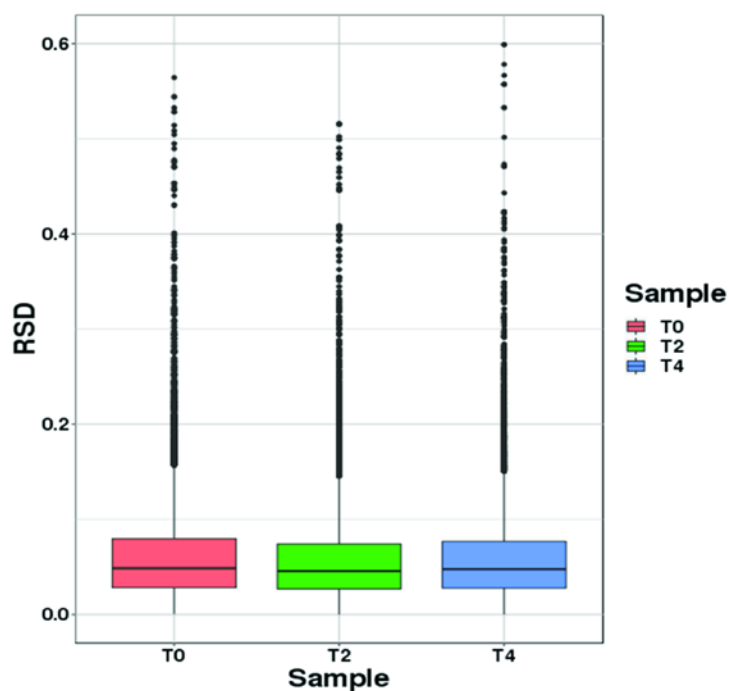

**Supplement Figure4. RSD of the Phospho-proteomic Analysis among Different Treatment Groups**  
Cells were treated with DMSO or TBM-2 for 24h. (T0: DMSO; T2: 2 $\mu$ M TBM-2; T4: 4 $\mu$ M TBM-2)

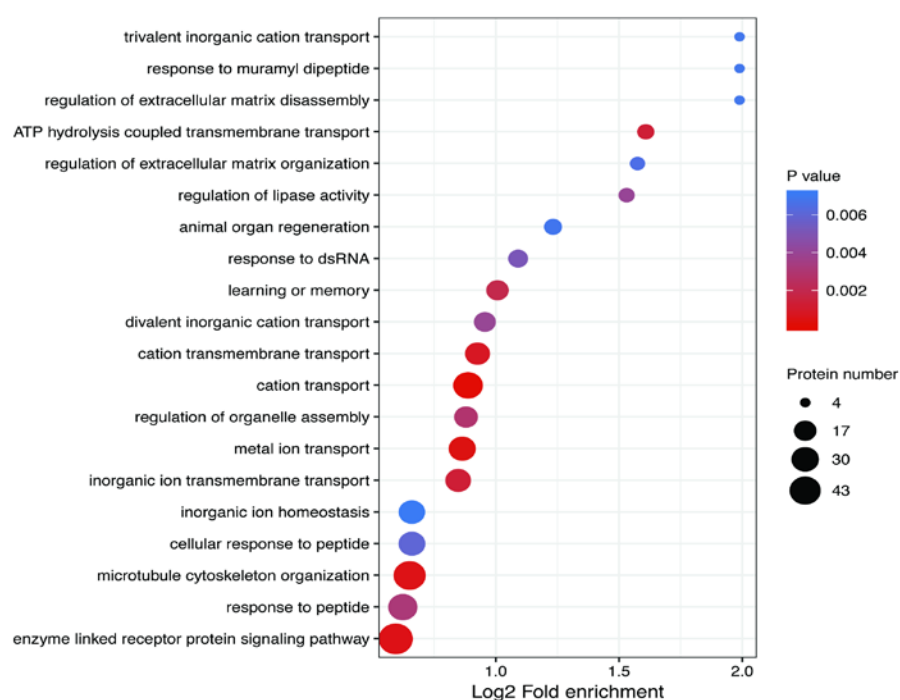

### Supplement Figure5. GO Enrichment Analysis on Proteins with Up/Down-regulated Status on Phosphorylation Due to TBM-2 Treatment

Cells were treated with either DMSO or 2 $\mu$ M TBM-2 for 24h before proteomic analysis.

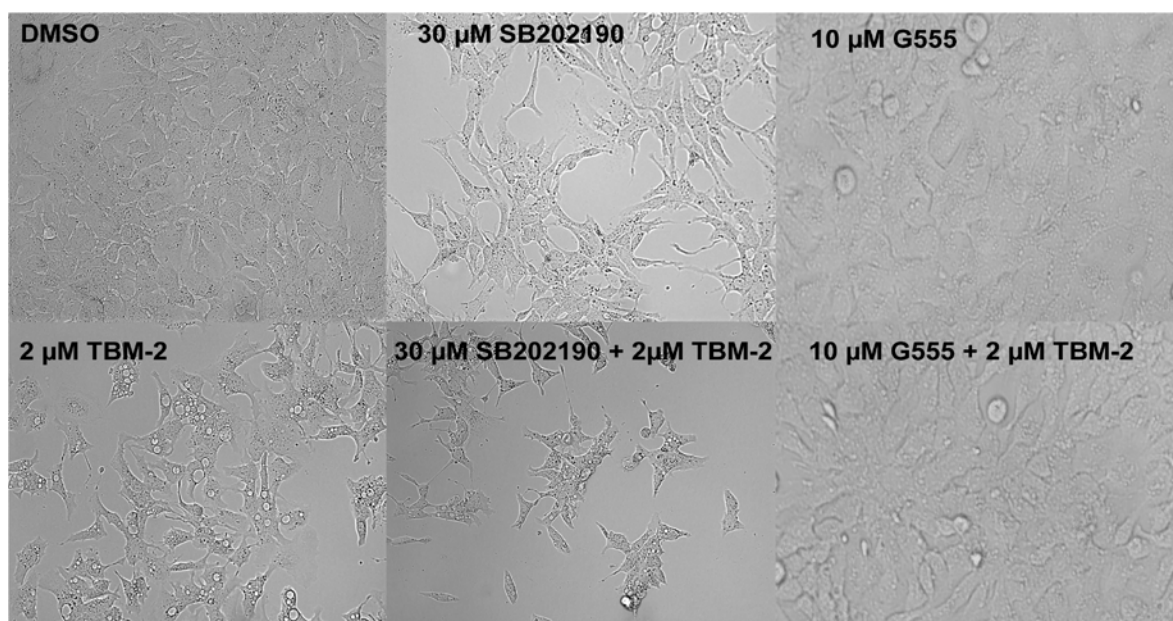

### Supplement Figure6. Cross-validation to support the functional role of MKK4--p38 $\alpha$ axis with other inhibitors.

Vacuoles were barely found in the cells that were pre-treated with 10  $\mu$ M G555 (Pak1 inhibitor) or 30 $\mu$ M SB 202190 (p38 $\alpha$  inhibitor) for 3h. In contrast, TBM-2 treatment alone could evoke massive vacuoles.
